# Supplementary material for: MR spectroscopy in pediatric neuroradiology
Source: PubMed Central journal article supplement — Transl Pediatr. 2021 Apr;10(4):1169–200. doi: 10.21037/tp-20-445 (PMC8107850; doi:10.21037/tp-20-445), 2021-04
Supplement: tp-10-04-1169-supplementary.pdf [file tp-10-04-1169-supplementary.pdf]

**Acronyms and abbreviations in tables, figures, and figure legends (alphabetical order)*****Metabolites***

AAs, amino acids; Ala, alanine; Cho, tCho, total choline; Cr, Cr<sub>1</sub>, creatine first peak; Cr<sub>2</sub>, creatine second peak; GAA, guanidinoacetate; Glc, glucose; Gln, glutamine; Glu, glutamate;  $\alpha$ -Glx, Glx<sub>dd</sub>, alpha-methine group of glutamate + glutamine;  $\beta$ ,  $\gamma$ -Glx, Glx<sub>m1, m2, m3</sub>, beta, gamma-methylene groups of glutamate + glutamine; Glyc, glycine; H<sub>2</sub>O, water peak; Lac, lactate; Lip, lipids; m-Ins, m-Ins<sub>1</sub>, Ins, Ins<sub>dd1, dd2</sub>, myo-Inositol first peak; m-Ins<sub>2</sub>, myo-Inositol second peak; MM, macromolecules; NAA, NAA<sub>1</sub>, N-acetyl-aspartate first peak; NAA<sub>2</sub>, N-acetyl-aspartate second peak; NAA<sub>3</sub>, N-acetyl-aspartate third peak; s-Ins, Scyllo, scyllo-Inositol; Tau, taurine; 2HG, 2-hydroxyglutarate.

***Other acronyms and abbreviations***

ADC, apparent diffusion coefficient; A.U., arbitrary units;

CH, methine group; CH<sub>3</sub>, methyl group; CSI, chemical shift imaging; DNET, dysembryoplastic neuroepithelial tumor; DWI, diffusion-weighted imaging; FLAIR, fluid attenuated inversion recovery; HIE, hypoxic-ischemic encephalopathy; H<sup>1</sup>MRS, hydrogen magnetic resonance spectroscopy; IDH, isocitrate dehydrogenase; LCModel, linear combination model; MRI, magnetic resonance imaging; ms, milliseconds; P, position; MB, medulloblastoma; POLR3A, RNA polymerase III subunit A; ppm, parts per million; PRESS, Point-RESolved Spectroscopy; SHH, sonic hedgehog; STIR, short Tau inversion recovery; SVS, single voxel spectroscopy; T, tesla; TE, echo time; VOI, volume of interest; WHO, World Health Organization; WI, weighted Images; WM, white matter; yo, years old; 4H, hypomyelination, hypogonadotropic hypogonadism and hypodontia.
